# Supplementary material for: LncRNA PANDAR regulates the G1/S transition of breast cancer cells by suppressing p16INK4A expression
Source: PubMed Central journal article supplement (PMC4772134; doi:10.1038/srep22366), 2016-03-01
Supplement: srep22366-s1.pdf [file srep22366-s1.pdf]

**LncRNA PANDAR regulates the G1/S transition of breast cancer cells by suppressing p16<sup>INK4A</sup>  
expression**

Yi Sang<sup>1,#</sup>, Jianjun Tang<sup>2,#</sup>, Siwei Li<sup>5,#</sup>, Liping Li<sup>1</sup>, XiaoFeng Tang<sup>1</sup>, Chun Cheng<sup>1</sup>, Yanqin Luo<sup>1</sup>, Xia Qian<sup>1</sup>, Liang-Ming Deng<sup>4</sup>, Lijuan Liu<sup>3</sup>, Xiao-Bin Lv<sup>1,\*</sup>

1 Nanchang Key Laboratory of Cancer Pathogenesis and Translational Research, Center Laboratory, the Third Affiliated Hospital, Nanchang University, Nanchang, P.R. China.

2 Department of Gastroenterology, Cancer Hospital of Jiangxi Province, Nanchang, P.R. China.

3 Department of pharmacy, Cancer Hospital of Jiangxi Province, Nanchang, P.R. China.

4 Department of Medicine, GaomingHeshui Hospital, Foshan, P.R. China

5 Department of Radiation Oncology, the Affiliated Hospital of Guilin Medical University, P.R. China

# These authors contribute equally to this work

\* Correspondence to: Xiao-Bin Lv, nclvxiaobin@sina.cn

Supplementary Table 1. qRT-PCR primers list.

| Name           | Sequence                  |
|----------------|---------------------------|
| PANDAR Forward | TGCACACATTTAACCCGAAG      |
| PANDAR Reverse | CCCCAAAGCTACATCTATGACA    |
| CCND1 Forward  | GCTCCTGGTGAACAAGCTCAA     |
| CCND1 Reverse  | TTGGAGAGGAAGTGTTCAATGAAA  |
| CCND2 Forward  | TGATGGGGAAGGAGTACAAA      |
| CCND2 Reverse  | TTGGAAGAAGAAGCAGGATG      |
| p16 Forward    | GTGGGTCCCAGTCTGCAGTTAAG   |
| p16 Reverse    | CATCATCATGACCTGGTCTTCTAGG |
| p21 Forward    | GCAGACCAGCATGACAGATTTC    |
| p21 Reverse    | GGATTAGGGCTTCCTCTTGGA     |
| CCNE1 Forward  | CTTCACAGGGAGACCTTTTAC     |
| CCNE1 Reverse  | CATTCAGCCAGGACACAATAG     |
| CCNE2 Forward  | TGATGGTGCTTGCAGTGAAGAGGA  |
| CCNE2 Reverse  | CACAAGGCAGCAGCAGTCAGTATT  |
| E2F1 Forward   | ATGTTTTCTGTGCCCTGAG       |
| E2F1 Reverse   | ATCTGTGGTGAGGGATGAGG      |
| MALAT1 Forward | GACGGAGGTTGAGATGAAGC      |
| MALAT1 Reverse | ATTCGGGGCTCTGTAGTCCT      |
| Actin Forward  | TGAAGTGTGACGTGGACATC      |
| Actin Reverse  | GGAGGAGCAATGATCTTGAT      |

p16

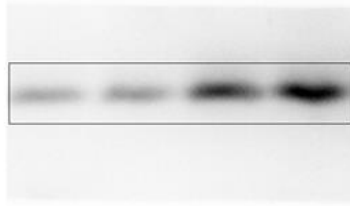

actin

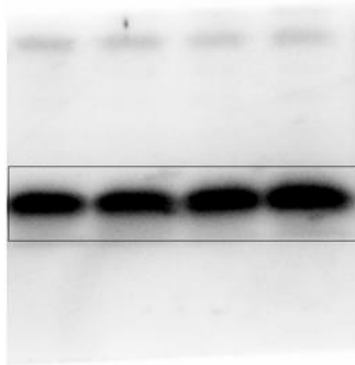

Supplementary Figure 1.

p16

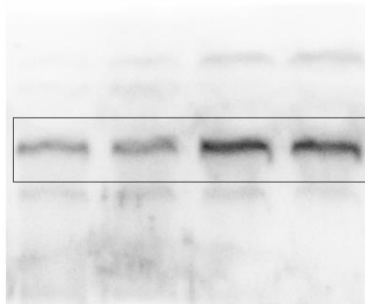

actin

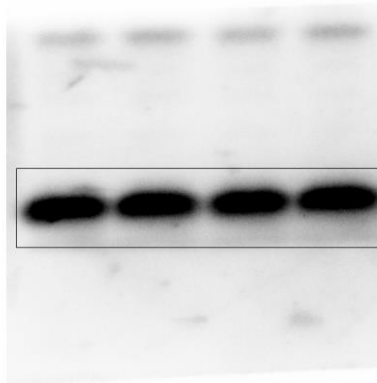

Supplementary Figure 2.
